# Supplementary material for: Gene expression in diapausing rotifer eggs in response to divergent environmental predictability regimes
Source: PubMed Central journal article supplement (PMC7721884; doi:10.1038/s41598-020-77727-2), 2020-12-07
Supplement: 41598_2020_77727_MOESM1_ESM.pdf [file 41598_2020_77727_MOESM1_ESM.pdf]

## Supplementary Material

### Gene expression in diapausing rotifer eggs in response to divergent environmental predictability regimes

Eva Tarazona<sup>1§</sup>, J. Ignacio Lucas-Lledó<sup>1§</sup>, María José Carmona<sup>1</sup> & Eduardo M. García-Roger<sup>1\*</sup>

<sup>1</sup> Institut Cavanilles de Biodiversitat i Biologia Evolutiva, Universitat de València, Valencia, Spain.

\* Corresponding author: [eduardo.garcia@uv.es](mailto:eduardo.garcia@uv.es)

§ Both authors contributed equally to this work.

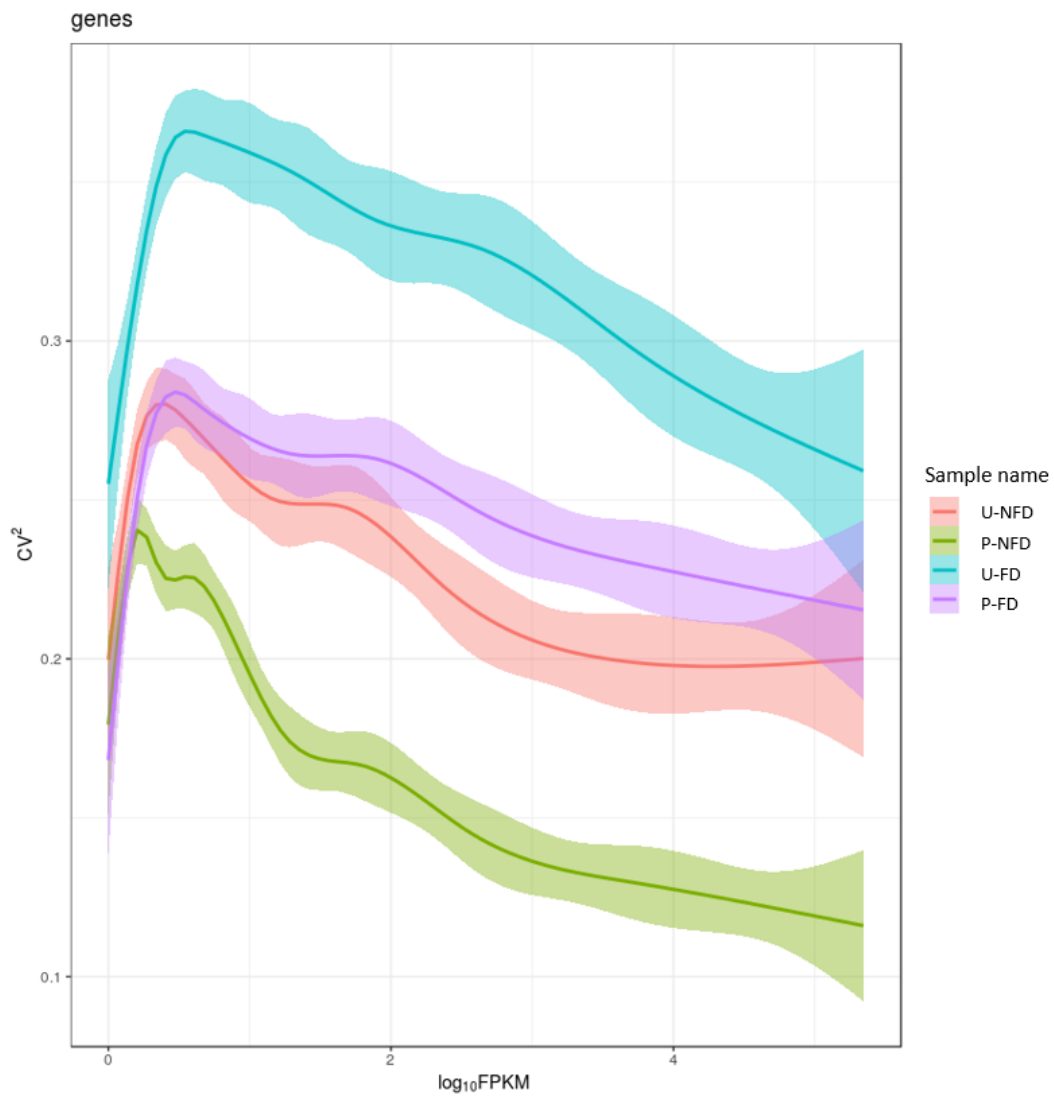

**Figure S1.** RPKM density distribution plot (the squared coefficient of variation ( $CV^2$ ) vs  $\log_{10}$ FPKM) per selective regime and diapause condition.

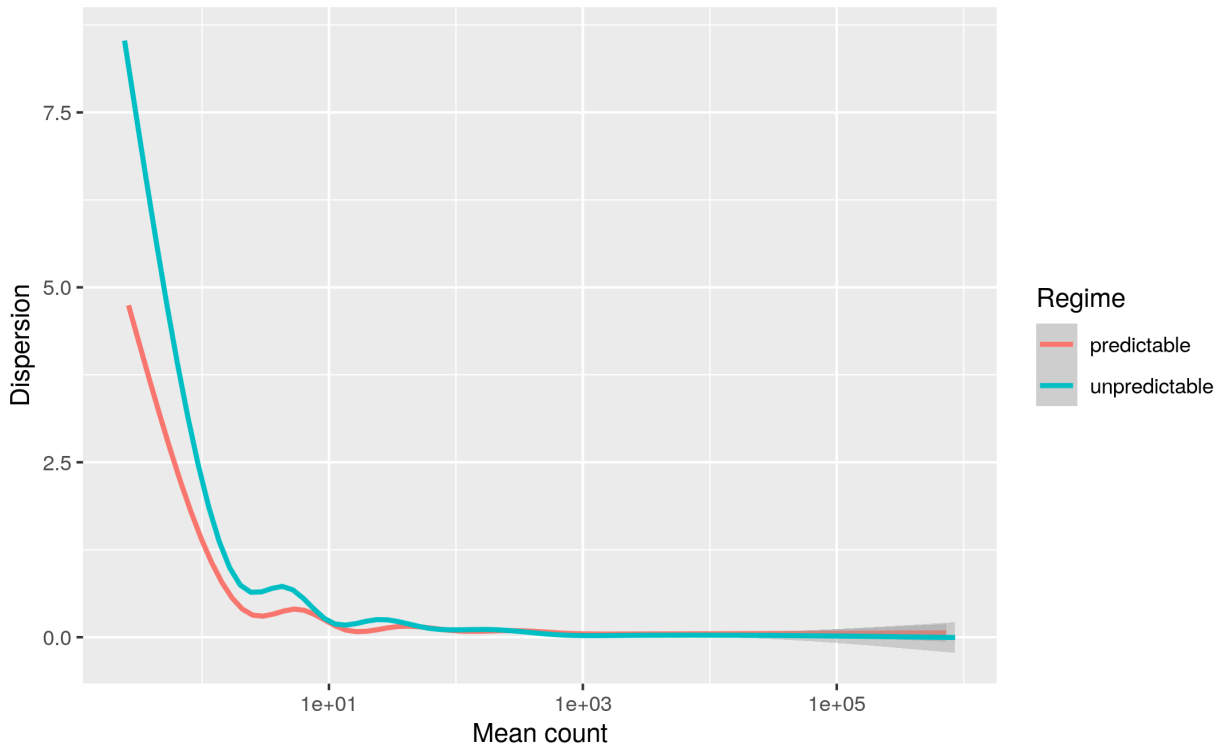

**Figure S2.** Estimated relationship between biological variation in gene expression between replicates (dispersion) and average level of expression among replicates, measured by a normalized number of counts. Estimates of gene-wise dispersions were obtained using the *estimateDispersion()* function of the *DESeq2* package, separately for samples from the two selective regimes.

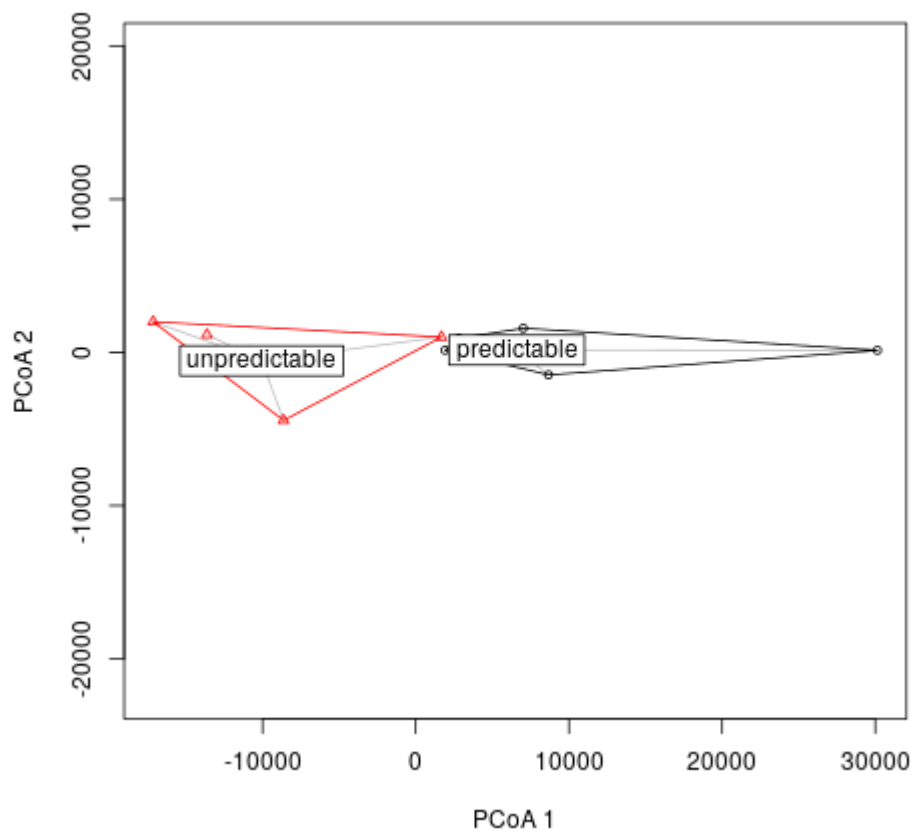

**Figure S3.** Principal coordinates of gene expression profiles based on Poisson distances. Distances of samples to their regime-specific centroid are not significantly different between selective regimes ( $p$ -value = 0.883).

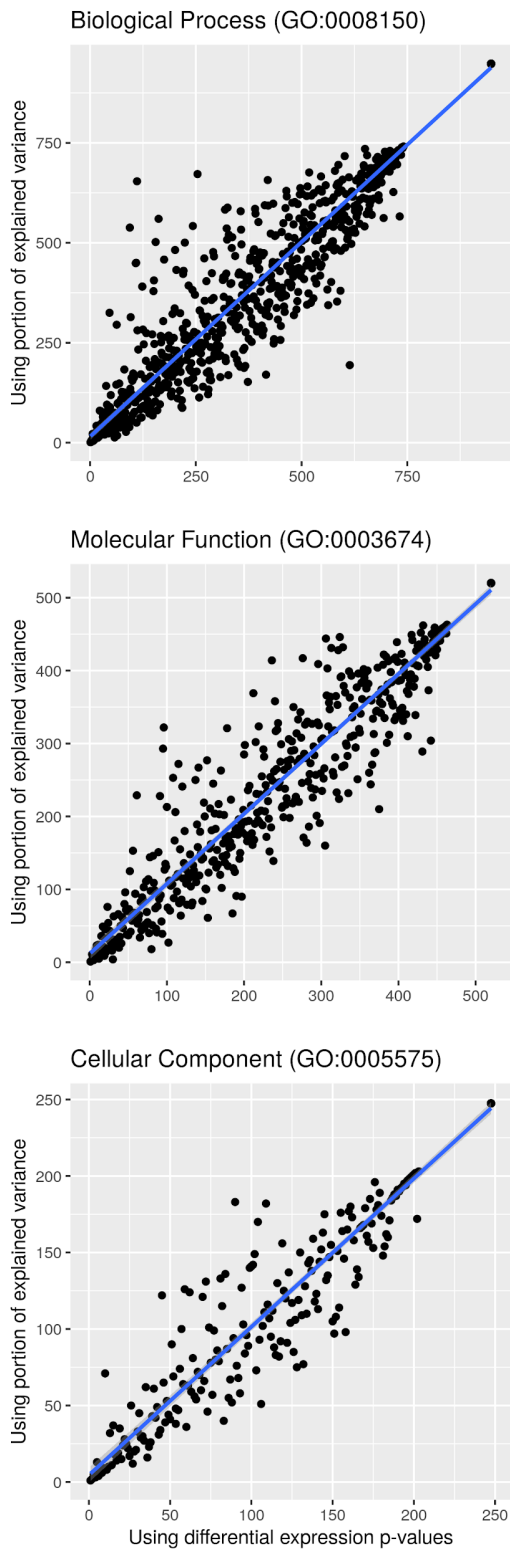

**Figure S4.** Ordination of gene ontology (GO) terms according to their significance in the enrichment analyses based on either the differential expression  $p$ -values or the portion of variance explained by regime.

**Table S1.** Gene Ontology (GO) specific terms for biological process (GO:0008150) significantly associated with selective regime according to all three algorithms used in enrichment analysis. *p*-values are derived from Kolmogorov-Smirnov tests.

| GO ID                      | GO Term                                                           | <i>p</i> -value |
|----------------------------|-------------------------------------------------------------------|-----------------|
| <a href="#">GO:0055085</a> | transmembrane transport                                           | < 0.001         |
| <a href="#">GO:0006508</a> | proteolysis                                                       | < 0.001         |
| <a href="#">GO:0055114</a> | oxidation-reduction process                                       | < 0.001         |
| <a href="#">GO:0007186</a> | G protein-coupled receptor signalling pathway                     | < 0.001         |
| <a href="#">GO:0006468</a> | protein phosphorylation                                           | < 0.001         |
| <a href="#">GO:0006813</a> | potassium ion transport                                           | < 0.001         |
| <a href="#">GO:0006355</a> | regulation of transcription, DNA-templated                        | < 0.001         |
| <a href="#">GO:0006289</a> | nucleotide-excision repair                                        | < 0.001         |
| <a href="#">GO:0034220</a> | ion transmembrane transport                                       | 0.001           |
| <a href="#">GO:0006470</a> | protein dephosphorylation                                         | 0.001           |
| <a href="#">GO:0006812</a> | cation transport                                                  | 0.002           |
| <a href="#">GO:0003341</a> | cilium movement                                                   | 0.002           |
| <a href="#">GO:0060271</a> | cilium assembly                                                   | 0.002           |
| <a href="#">GO:0005992</a> | trehalose biosynthetic process                                    | 0.003           |
| <a href="#">GO:0007018</a> | microtubule-based movement                                        | 0.003           |
| <a href="#">GO:0006367</a> | transcription initiation from RNA polymerase II promoter          | 0.004           |
| <a href="#">GO:0046039</a> | GTP metabolic process                                             | 0.004           |
| <a href="#">GO:0046129</a> | purine ribonucleoside biosynthetic process                        | 0.004           |
| <a href="#">GO:0007160</a> | cell-matrix adhesion                                              | 0.005           |
| <a href="#">GO:0070836</a> | caveola assembly                                                  | 0.006           |
| <a href="#">GO:0006821</a> | chloride transport                                                | 0.007           |
| <a href="#">GO:0006979</a> | response to oxidative stress                                      | 0.007           |
| <a href="#">GO:0043161</a> | proteasome-mediated ubiquitin-dependent protein catabolic process | 0.008           |
| <a href="#">GO:0051260</a> | protein homooligomerization                                       | 0.008           |
| <a href="#">GO:0008272</a> | sulphate transport                                                | 0.009           |

**Table S2.** Gene ontology (GO) specific terms for molecular function (GO:0003674) significantly associated with selective regime according to all three algorithms used in enrichment analysis. *p*-values are derived from Kolmogorov-Smirnov tests.

| GO ID                      | GO Term                                                          | <i>p</i> -value |
|----------------------------|------------------------------------------------------------------|-----------------|
| <a href="#">GO:0005515</a> | protein binding                                                  | < 0.001         |
| <a href="#">GO:0005509</a> | calcium ion binding                                              | < 0.001         |
| <a href="#">GO:0003774</a> | motor activity                                                   | < 0.001         |
| <a href="#">GO:0004930</a> | G protein-coupled receptor activity                              | < 0.001         |
| <a href="#">GO:0004252</a> | serine-type endopeptidase activity                               | < 0.001         |
| <a href="#">GO:0005524</a> | ATP binding                                                      | < 0.001         |
| <a href="#">GO:0004672</a> | protein kinase activity                                          | < 0.001         |
| <a href="#">GO:0022857</a> | transmembrane transporter activity                               | < 0.001         |
| <a href="#">GO:0042626</a> | ATPase activity, coupled to transmembrane movement of substances | 0.001           |
| <a href="#">GO:0004198</a> | calcium-dependent cysteine-type endopeptidase activity           | 0.001           |
| <a href="#">GO:0005525</a> | GTP binding                                                      | 0.001           |
| <a href="#">GO:0061630</a> | ubiquitin protein ligase activity                                | 0.001           |
| <a href="#">GO:0004181</a> | metallocarboxypeptidase activity                                 | 0.001           |
| <a href="#">GO:0005230</a> | extracellular ligand-gated ion channel activity                  | 0.002           |
| <a href="#">GO:0005249</a> | voltage-gated potassium channel activity                         | 0.002           |
| <a href="#">GO:0005507</a> | copper ion binding                                               | 0.003           |
| <a href="#">GO:0051015</a> | actin filament binding                                           | 0.003           |
| <a href="#">GO:0016840</a> | carbon-nitrogen lyase activity                                   | 0.004           |
| <a href="#">GO:0004550</a> | nucleoside diphosphate kinase activity                           | 0.005           |
| <a href="#">GO:0004601</a> | peroxidase activity                                              | 0.005           |
| <a href="#">GO:0030246</a> | carbohydrate binding                                             | 0.005           |
| <a href="#">GO:0005200</a> | structural constituent of cytoskeleton                           | 0.006           |
| <a href="#">GO:0016491</a> | oxidoreductase activity                                          | 0.007           |
| <a href="#">GO:0003777</a> | microtubule motor activity                                       | 0.008           |
| <a href="#">GO:0047631</a> | ADP-ribose diphosphatase activity                                | 0.008           |

**Table S3.** Gene ontology (GO) specific terms for cellular component (GO:0005575) significantly associated with selective regime according to all three algorithms used in enrichment analysis. *p*-values are derived from Kolmogorov-Smirnov tests.

| GO ID                      | GO Term                                        | <i>p</i> -value |
|----------------------------|------------------------------------------------|-----------------|
| <a href="#">GO:0016020</a> | membrane                                       | < 0.001         |
| <a href="#">GO:0016459</a> | myosin complex                                 | < 0.001         |
| <a href="#">GO:0008076</a> | voltage-gated potassium channel complex        | < 0.001         |
| <a href="#">GO:0005887</a> | integral component of plasma membrane          | 0.001           |
| <a href="#">GO:0005576</a> | extracellular region                           | 0.001           |
| <a href="#">GO:0090575</a> | RNA polymerase II transcription factor complex | 0.001           |
| <a href="#">GO:0005634</a> | nucleus                                        | 0.003           |
| <a href="#">GO:0005886</a> | plasma membrane                                | 0.003           |
| <a href="#">GO:0005743</a> | mitochondrial inner membrane                   | 0.004           |
| <a href="#">GO:0005929</a> | cilium                                         | 0.004           |
| <a href="#">GO:0005741</a> | mitochondrial outer membrane                   | 0.009           |
